# Supplementary material
Source: PubMed Central journal article supplement (PMC4705097)
Supplement: NIHMS736737-supplement-supplement_1.pdf [file NIHMS736737-supplement-supplement_1.pdf]

Supplemental Table:

**Table X. Correlation between Mean Dose and Brain Volumes**

| Pearson Correlation Coefficients, N = 76<br>Prob >  r  under H0: Rho=0 |                             |                             |                         |
|------------------------------------------------------------------------|-----------------------------|-----------------------------|-------------------------|
|                                                                        | Infratentorial<br>Brain     | Anterior<br>Cerebellum      | Posterior<br>Cerebellum |
| Infratentorial<br>Brain                                                | 1.00000                     | 0.58561<br>(P<.0001)        | 0.88448<br>(P<.0001)    |
| Anterior<br>Cerebellum                                                 | <b>0.58561</b><br>(P<.0001) | 1.00000                     | 0.51360<br>(P<.0001)    |
| Posterior<br>Cerebellum                                                | <b>0.88448</b><br>(P<.0001) | <b>0.51360</b><br>(P<.0001) | 1.00000                 |
